# Supplementary material for: Serial SARS-CoV-2 antibody titers in vaccinated dialysis patients: prevalence of unrecognized infection and duration of seroresponse
Source: bioRxiv or medRxiv preprint supplement (doi:10.1101/2023.03.16.23287322), 2023-03-17
Supplement: Supplementary file [file media-2.pdf]

|                                                                      | Initial series cohort |                 |            |                 | Third dose cohort |                 |            |                 |
|----------------------------------------------------------------------|-----------------------|-----------------|------------|-----------------|-------------------|-----------------|------------|-----------------|
| Threshold for defining undiagnosed infection by an increase in titer | 100 BAU/mL            |                 | 200 BAU/mL |                 | 100 BAU/mL        |                 | 200 BAU/mL |                 |
|                                                                      | n (%)                 | % of infections | n (%)      | % of infections | n (%)             | % of infections | n (%)      | % of infections |
| Diagnosed SARS-CoV-2 infection                                       | 371 (14%)             | 76%             | 379 (14%)  | 82%             | 155 (9%)          | 80%             | 155 (9%)   | 87%             |
| Undiagnosed SARS-CoV-2 infection                                     | 115 (4%)              | 24%             | 85 (3%)    | 18%             | 39 (2%)           | 20%             | 23 (1%)    | 13%             |
| No SARS-CoV-2 infection                                              | 2174 (82%)            | ---             | 2196 (83%) | ---             | 1523 (89%)        | ---             | 1539 (90%) | ---             |
| Total                                                                | 2660                  |                 | 2660       |                 | 1717              |                 | 1717       |                 |

**Supplemental Table 1.** Identification of undiagnosed SARS-CoV-2 infections by increase in anti-spike IgG titer. An increase of 100 BAU/mL in the 3-month rolling average titer was used as the primary analysis, and an increase of 200 BAU/mL was used in a sensitivity analysis.

| No prior COVID-19 |     |                |     |     |       | Prior COVID-19 |     |                |     |     |       |
|-------------------|-----|----------------|-----|-----|-------|----------------|-----|----------------|-----|-----|-------|
|                   |     | Initial series |     |     |       |                |     | Initial series |     |     |       |
|                   |     | J              | MM  | PP  | Total |                |     | J              | MM  | PP  | Total |
| Third dose        | J   | 18             | 0   | 1   | 19    | Third dose     | J   | 5              | 0   | 0   | 5     |
|                   | M   | 25             | 640 | 91  | 756   |                | M   | 1              | 124 | 15  | 140   |
|                   | M/2 | 49             | 111 | 6   | 166   |                | M/2 | 6              | 11  | 0   | 17    |
|                   | P   | 24             | 230 | 522 | 776   |                | P   | 6              | 29  | 91  | 126   |
| Total             |     | 116            | 981 | 620 | 1717  | Total          |     | 18             | 164 | 106 | 288   |

**Supplemental Table 2.** Among those who received a third (additional) vaccine dose, the breakdown of vaccine type received, by initial vaccine series and by third dose. Here, each capital letter (J, M, or P) represents a single dose of Janssen, Moderna, or Pfizer vaccine, respectively. M/2 represents half-dose Moderna.
