# Supplementary material for: Serial SARS-CoV-2 antibody titers in vaccinated dialysis patients: prevalence of unrecognized infection and duration of seroresponse
Source: bioRxiv or medRxiv preprint supplement (doi:10.1101/2023.03.16.23287322), 2023-03-17
Supplement: Supplementary file [file media-3.pdf]

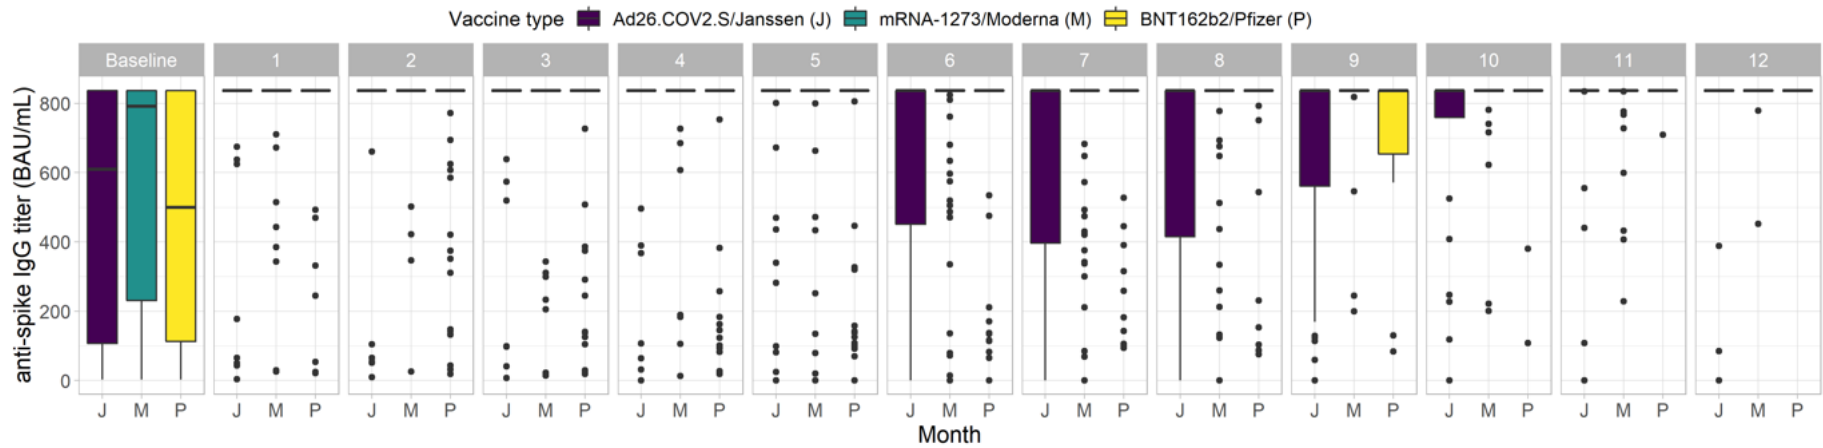

| N =     |     |     |     |     |     |     |     |     |    |    |    |    |    |    |  |  |  |
|---------|-----|-----|-----|-----|-----|-----|-----|-----|----|----|----|----|----|----|--|--|--|
| JANSSEN | 21  | 56  | 58  | 56  | 55  | 57  | 56  | 58  | 49 | 40 | 32 | 26 | 23 |    |  |  |  |
| MODERNA | 133 | 160 | 177 | 177 | 168 | 144 | 105 | 103 | 69 | 48 | 42 | 34 | 22 |    |  |  |  |
| PFIZER  |     | 72  | 115 | 108 | 105 | 108 | 90  | 79  | 54 | 37 | 22 | 17 | 18 | 13 |  |  |  |

**Supplemental Figure 1. Anti-spike IgG titers vs months after date of full immunization, comparing by vaccine type, among patients with prior COVID-19 in the initial series cohort**

Of note, the boxplots shown here are bounded by the upper and lower limits of the assay used. The dots represent the outliers, defined as greater than 1.5\*IQR above the third quartile or less than 1.5\*IQR below the first quartile.

The tables of N show the number of titers for each month, by vaccine type.

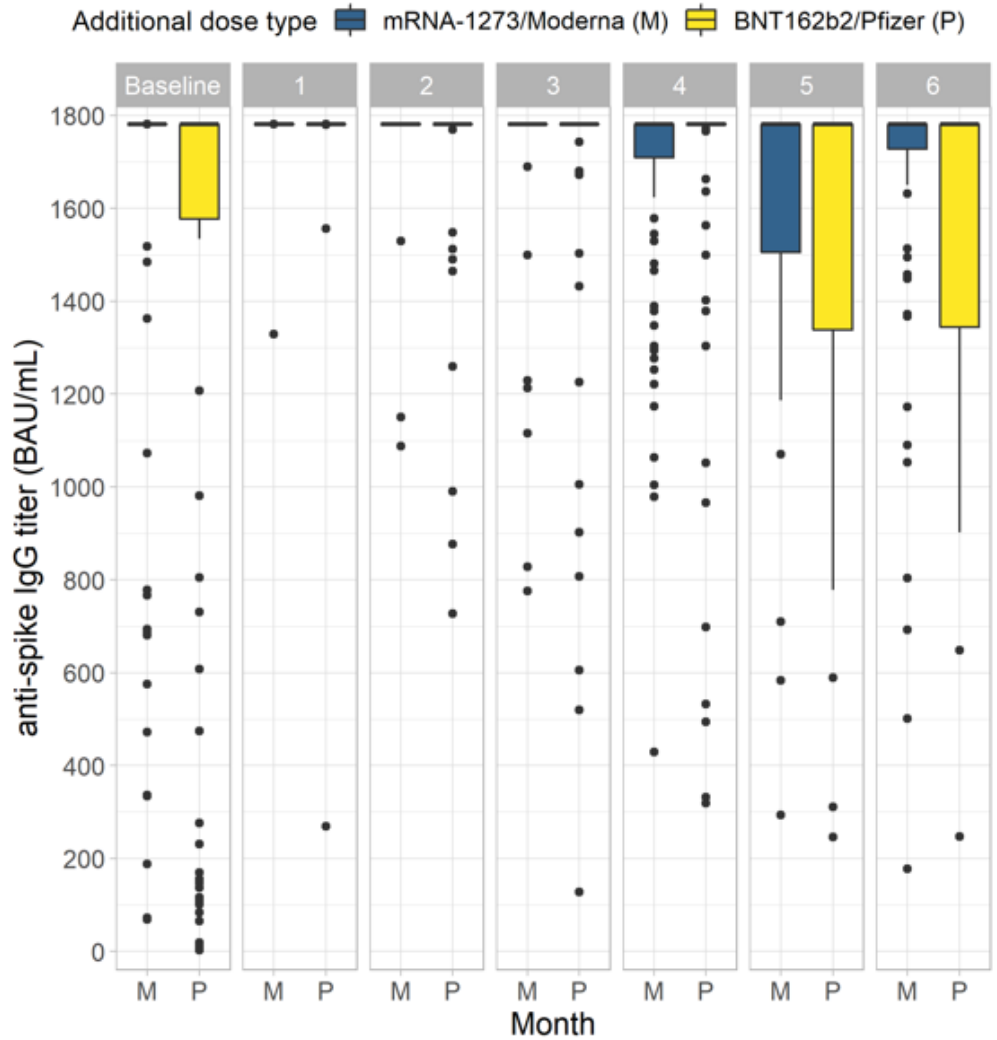

| N =     |     |     |     |     |    |    |    |
|---------|-----|-----|-----|-----|----|----|----|
| MODERNA | 115 | 103 | 104 | 105 | 90 | 71 | 68 |
| PFIZER  | 95  | 91  | 93  | 80  | 67 | 38 | 47 |

**Supplemental Figure 2. Anti-spike IgG titers vs months after date of full immunization by third vaccine dose, comparing by vaccine type, among patients with prior COVID-19 in the third dose cohort**

Of note, the boxplots shown here are bounded by the upper and lower limits of the assay used. The dots represent the outliers, defined as greater than  $1.5 \times \text{IQR}$  above the third quartile or less than  $1.5 \times \text{IQR}$  below the first quartile.

The tables of N show the number of titers for each month, by vaccine type.
